# Supplementary material
Source: publisher site journal article supplement (https://www.kjim.org/upload/media/kjim-2024-054-Supplementary-Fig-1.pdf)
Supplement: Supplementary file 1 [file kjim-2024-054-Supplementary-Fig-1.pdf]

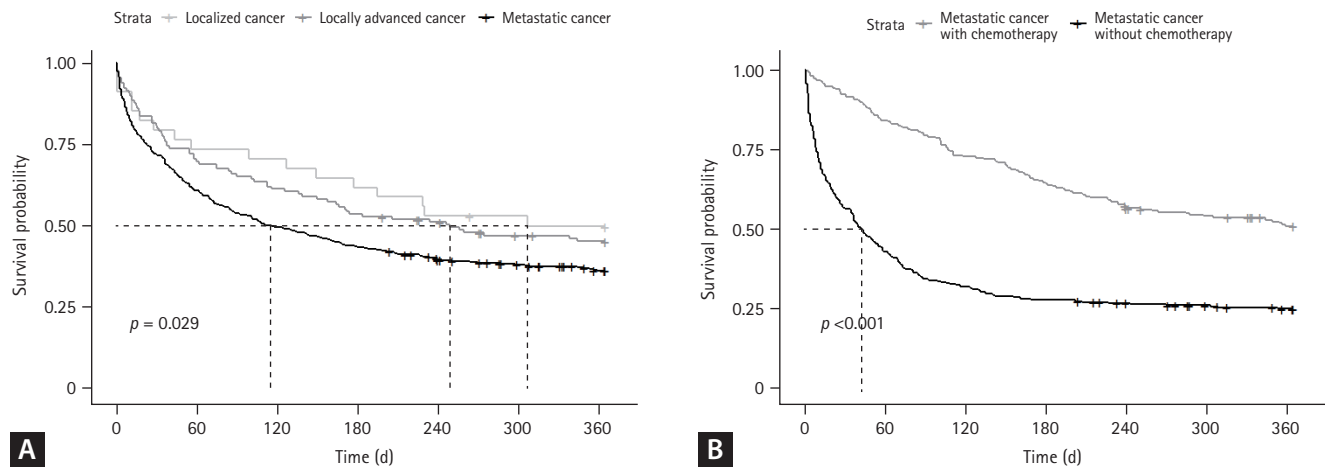

**Supplementary Figure 1.** One-year survival curves after ICU discharge in ICU survived cancer patient. (A) Based on cancer stages. The median survival was 307 days, 249 days, and 113 days, respectively. (B) Based on whether chemotherapy was done after ICU discharge. The median survival was 383 days and 42 days, respectively. ICU, intensive care unit.
